# Supplementary material for: Prevalence and Sociodemographic Predictors of Mental Health in a Representative Sample of Young Adults from Germany, Israel, Poland, and Slovenia: A Longitudinal Study during the COVID-19 Pandemic
Source: MDPI journal article supplement (doi:10.3390/ijerph19031334), 2022-01-25
Supplement: s1 [file s1]

Supplementary Table S1

The number of participants regarding the place of residence in Germany, Israel, Slovenia, and Poland.

| Country  | District / Voivodship                  | N     | %     |
|----------|----------------------------------------|-------|-------|
| Germany  | Baden-Württemberg                      | 50    | 12.0  |
|          | Bayern                                 | 62    | 14.8  |
|          | Berlin                                 | 17    | 4.1   |
|          | Brandenburg                            | 11    | 2.6   |
|          | Hessen-Thüringen                       | 45    | 10.8  |
|          | Mecklenburg-Vorpommern                 | 8     | 1.9   |
|          | Niedersachsen-Bremen                   | 46    | 11.0  |
|          | Nordrhein-Westfalen                    | 92    | 22.0  |
|          | Rheinland-Pfalz-Saarland               | 22    | 5.3   |
|          | Sachsen- Sachsen-Anhalt                | 39    | 9.3   |
|          | Schleswig-Holstein-Hamburg             | 26    | 6.2   |
|          | Total                                  | 418   | 100   |
| Israel   | Northern District                      | 50    | 11.7  |
|          | Haifa District                         | 51    | 11.9  |
|          | Central District                       | 132   | 30.8  |
|          | Tel Aviv District                      | 87    | 20.3  |
|          | Jerusalem District                     | 44    | 10.3  |
|          | Southern District                      | 54    | 12.6  |
|          | From the Judea and Samaria District    | 10    | 2.3   |
|          | Total                                  | 428   | 100.0 |
| Slovenia | East Slovenia                          | 242   | 56.10 |
|          | West Slovenia                          | 189   | 43.90 |
|          | Total                                  | 431   | 100   |
| Poland   | Dolnośląskie (Lower Silesia)           | 28    | 6.3   |
|          | Kujawsko-Pomorskie (Kuyavia-Pomerania) | 17    | 3.8   |
|          | Lubelskie (Lublin)                     | 40    | 9.0   |
|          | Lubuskie                               | 12    | 2.7   |
|          | Łódzkie (Łódzkie)                      | 25    | 5.6   |
|          | Małopolskie (Lesser Poland)            | 25    | 5.6   |
|          | Mazowieckie (Masovia)                  | 72    | 16.1  |
|          | Opolskie (Opole)                       | 19    | 4.3   |
|          | Podkarpackie (Subcarphatia)            | 37    | 8.3   |
|          | Podlaskie                              | 12    | 2.7   |
|          | Pomorskie (Pomerania)                  | 19    | 4.3   |
|          | Śląskie (Silesia)                      | 49    | 11.0  |
|          | Świętokrzyskie                         | 24    | 5.4   |
|          | Warmińsko-Mazurskie (Warmia-Masuria)   | 12    | 2.7   |
|          | Wielkopolska (Greater Poland)          | 41    | 9.2   |
|          | Zachodniopomorskie (West Pomerania)    | 14    | 3.1   |
|          | Total                                  | 446   | 100   |
| TOTAL    |                                        | 1,723 | 100   |
